# Supplementary material for: β-Aminoisobutyric acid (L-BAIBA) is a novel regulator of mitochondrial biogenesis and respiratory function in human podocytes
Source: PubMed Central journal article supplement (PMC9840613; doi:10.1038/s41598-023-27914-8), 2023-01-14
Supplement: 41598_2023_27914_MOESM1_ESM.pdf [file 41598_2023_27914_MOESM1_ESM.pdf]

## Supplementary Information

**Table S1. Primers and Taq-Man hydrolysis probes used in the experiments.**

| Gene                                          | Accession no.  | Primer sequence (5'-3')                                               | Probe (5'-3') | Product |
|-----------------------------------------------|----------------|-----------------------------------------------------------------------|---------------|---------|
| <i>mtDNA tRNA<sup>Leu</sup></i>               | NC_012920.1    | Forward: CACCCAAGAACAGGGTTTGT<br>Reverse: TGGCCATGGGTATGTTGTTA        | —             | 107 bp  |
| <i>nDNA <math>\beta</math>2-microglobulin</i> | NC_000015.10   | Forward: TGCTGTCTCCATGTTTGATGTATCT<br>Reverse: TCTCTGCTCCCCACCTCTAAGT | —             | 86 bp   |
| <i>MRGPRD</i>                                 | NM_198923.2    | Forward: CCGTGGAGTCAGCCCTAAAC<br>Reverse: CAGAAGGGGTTCTGTGCAT         | CTGCTGGG      | 157 bp  |
| <i>TFAM</i>                                   | NM_003201.2    | Forward: GTTTCTCCGAAGCATGTGG<br>Reverse: AGATGAAAACCACCTCGGTAAA       | TGCCCTGG      | 127 bp  |
| <i>PGC-1<math>\alpha</math></i>               | NM_001330751.1 | Forward: CACCCTCTTCTTCTTCTTTT<br>Reverse: GGGGCTCCAATTTTACCAAT        | CCTCCTGG      | 108 bp  |
| <i><math>\beta</math>-actin</i>               | X00351.1       | Forward: ATTGGCAATGAGCGGTTC<br>Reverse: GGATGCCACAGGACTCCA            | CTTCCAGC      | 76 bp   |

**Table S2. Primary antibodies used in Western blot experiments.**

| Antibody      | Clonality  | Dilution | Source                   | Catalog no. |
|---------------|------------|----------|--------------------------|-------------|
| TFAM          | monoclonal | 1:200    | Santa Cruz Biotechnology | sc-166965   |
| PGC1 $\alpha$ | monoclonal | 1:125    | Santa Cruz Biotechnology | sc-517380   |
| MRGPRD        | monoclonal | 1:1000   | Abcam                    | ab155099    |
| Synaptopodin  | polyclonal | 1:50     | Santa Cruz Biotechnology | sc-21537    |
| Actin         | monoclonal | 1:10000  | Sigma-Aldrich            | A3853       |

### Figure S1. Uncropped immunoblot membranes

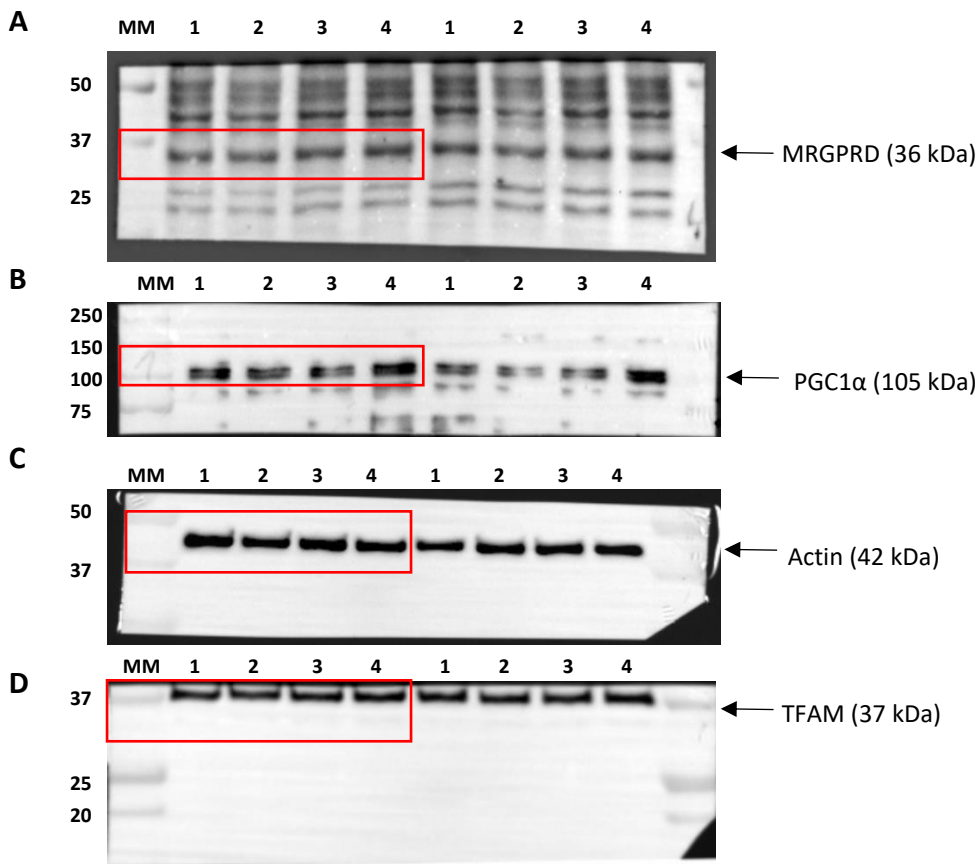

**Fig. S1.** Immunoblot membranes. A. Mas-related G protein-coupled receptor type D (MRGPRD) receptor. **Original for Fig. 1b.** B. Peroxisome proliferator activated receptor  $\alpha$  coactivator-1 $\alpha$  (PGC1 $\alpha$ ). **Original for Fig. 4c.** C.  $\beta$ -actin. **Original for Fig. 1b and 4c.** D. Transcription factor A mitochondrial (TFAM). **Original for Fig. 4c.** Lane 1 – control, 2 – BAIBA 24 h, 3 – BAIBA 2 days, 4 – BAIBA 5 days. MM – molecular marker.

### Figure S2. Gels with PCR products

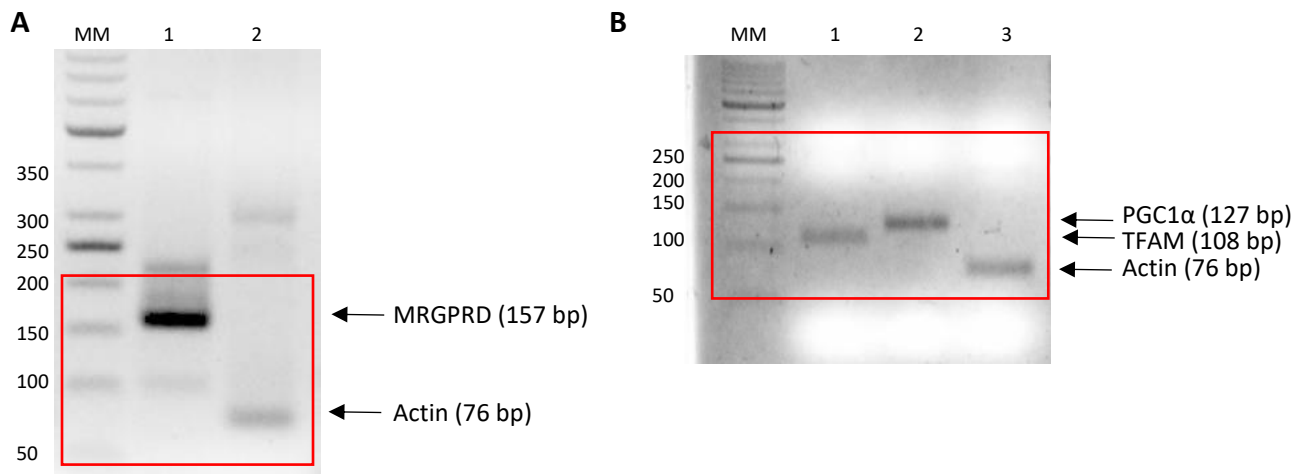

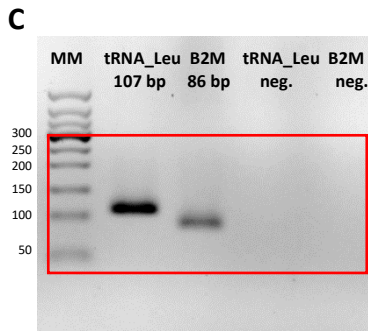

**Fig. S2.** Agarose gels 2.5% showing PCR products. A. MRGPRD receptor (157 bp; lane 1) ,  $\beta$ -actin (76 bp; lane 2). **Original for 1d.** B. TFAM (108 bp; lane 1), PGC1 $\alpha$  (127 bp; lane 2),  $\beta$ -actin (76 bp; lane 3). **Original for 4f.** C. DNA levels tRNA\_Leu (mtDNA) (107 bp),  $\beta$ 2-microglobulin (86 bp), negative controls. **Original for 3b.** MM – molecular marker.

### Figure S3. MRGPRD levels in glomeruli isolated from diabetic rats.

The *in vivo* relevance of the observations from podocyte cell culture was verified using glomeruli isolated from rat model of diabetes. In streptozotocin-induced (STZ) diabetic rats, which were characterized by hyperglycemia and overt proteinuria, we observed that glomerular level of BAIBA receptor MRGPRD was reduced to ~54% of the control (Fig. S3A, B).

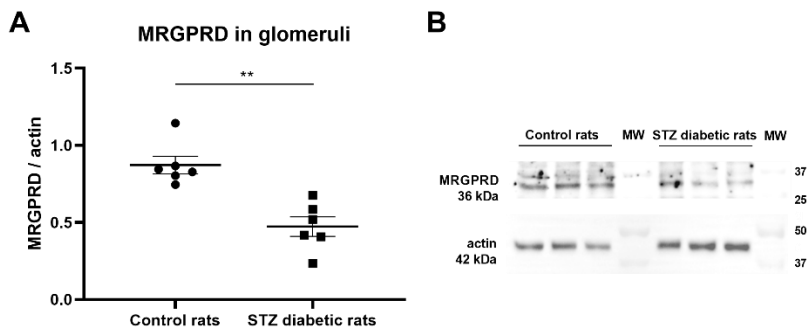

**Fig. S3.** BAIBA receptor, MRGPRD, is decreased in glomeruli isolated from streptozotocin-induced (STZ) diabetic rats. A. MRGPRD protein levels in freshly isolated glomeruli from control and diabetic rats. N = 6,  $**p < 0.01$ . B. Representative immunoblots (1,2,3 – different rats).

### Immunoblot membranes for quantification of PGC1 $\alpha$ and TFAM.

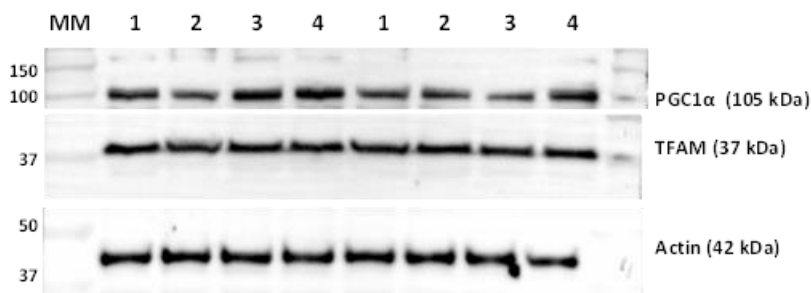

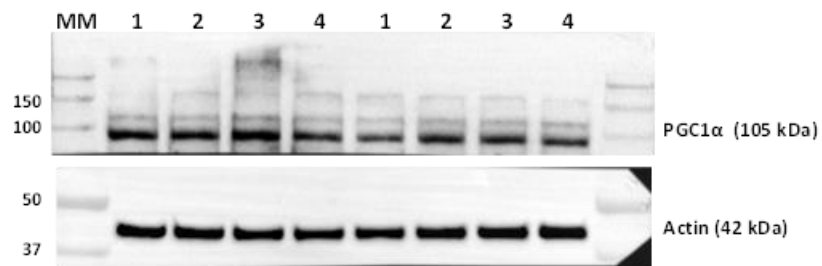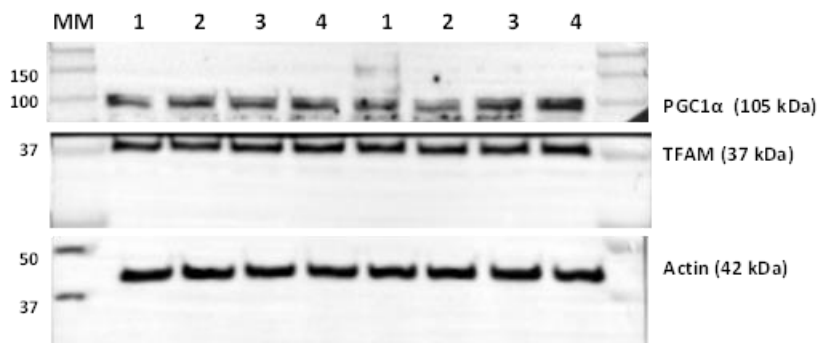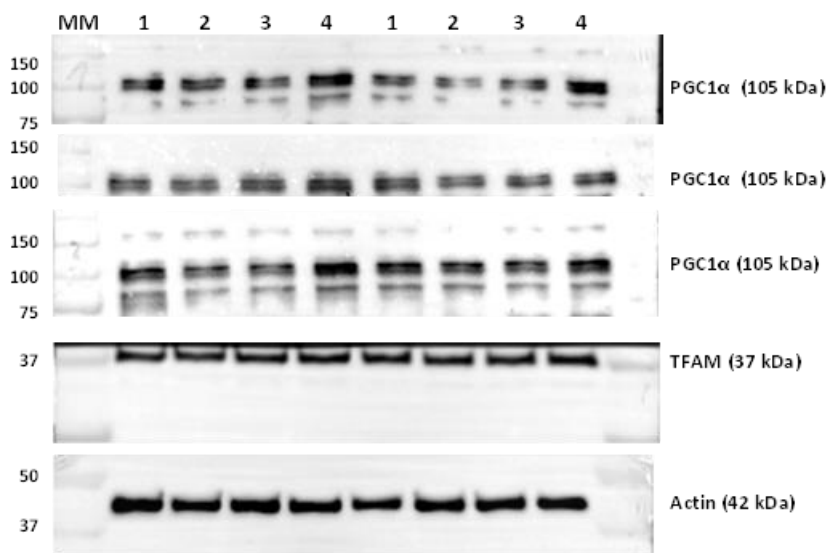

Immunoblot membranes. Lane 1 – control, 2 – BAIBA 24 h, 3 – BAIBA 2 days, 4 – BAIBA 5 days. MM – molecular marker.
